# Supplementary material for: General formalism for vibronic Hamiltonians in tetragonal symmetry and beyond
Source: Royal Society of Chemistry journal article supplement (doi:10.1039/c8cp01394b), 2018-01-01
Supplement: c8cp01394b1.pdf [file c8cp01394b1.pdf]

# General formalism for vibronic Hamiltonians in tetragonal symmetry and beyond

## Supporting Information

Riley J. Hickman, Robert A. Lang, and Tao Zeng\*

*Department of Chemistry, Carleton University, Ottawa, Ontario, K1S5B6, Canada*

E-mail: toby.zeng@carleton.ca

### List of Figures

### List of Tables

|    |                                                                                                                         |    |
|----|-------------------------------------------------------------------------------------------------------------------------|----|
| S1 | Constraints on expansions in Table 2 in the main text to give the appropriate<br>( $\chi^{C_4} = 1, \chi^I$ ). . . . .  | S5 |
| S2 | Constraints on expansions in Table 3 in the main text to give the appropriate<br>( $\chi^{C_4} = -1, \chi^I$ ). . . . . | S6 |
| S3 | Constraints on expansions in Table 4 in the main text to give the appropriate<br>( $\chi^{C_4} = i, \chi^I$ ). . . . .  | S6 |

## Section S1 Acting $A$ -, $B$ - and $E_{+1}$ -projection operators on $f(w, \rho, \phi)$ .

Acting the  $A$ -irrep projection operator on  $f$  gives a  $\hat{C}_4$ -eigenfunction with eigenvalue 1:

$$\begin{aligned}
f^{(1)}(w, \rho, \phi) &= f(w, \rho, \phi) + \hat{C}_4 f(w, \rho, \phi) + \hat{C}_4^2 f(w, \rho, \phi) + \hat{C}_4^3 f(w, \rho, \phi) \\
&= a_{m,n,K} \left( w^m \rho^{|n|+2K} e^{in\phi} + (-w)^m \rho^{|n|+2K} e^{in(\phi-\frac{\pi}{2})} \right. \\
&\quad \left. + w^m \rho^{|n|+2K} e^{in(\phi-\pi)} + (-w)^m \rho^{|n|+2K} e^{in(\phi-\frac{3\pi}{2})} \right) \\
&= a_{m,n,K} w^m \rho^{|n|+2K} e^{in\phi} (1 + (-1)^m (-i)^n + (-1)^n + (-1)^m i^n) \\
&= a_{m,n,K} w^m \rho^{|n|+2K} e^{in\phi} (1 + (-1)^n) (1 + (-1)^m i^n) \\
&\quad [n \text{ needs to be even; } n \rightarrow 2n] \\
&= 2a_{m,2n,K} w^m \rho^{|2n|+2K} e^{i2n\phi} \left( 1 + (-1)^{(m+n)} \right) \\
&\quad [m+n \text{ needs to be even; } m \rightarrow \text{mod}(n, 2) + 2I] \\
&= a_{I,2n,K} w^{\text{mod}(n,2)+2I} \rho^{|2n|+2K} e^{i2n\phi}. \tag{S1}
\end{aligned}$$

Acting the  $B$ -irrep projection operator on  $f$  gives an eigenfunction with eigenvalue  $-1$ :

$$\begin{aligned}
f^{(-1)}(w, \rho, \phi) &= f(w, \rho, \phi) - \hat{C}_4 f(w, \rho, \phi) + \hat{C}_4^2 f(w, \rho, \phi) - \hat{C}_4^3 f(w, \rho, \phi) \\
&= a_{m,n,K} w^m \rho^{|n|+2K} e^{in\phi} (1 - (-1)^m (-i)^n + (-1)^n - (-1)^m i^n) \\
&= a_{m,n,K} w^m \rho^{|n|+2K} e^{in\phi} (1 + (-1)^n) (1 - (-1)^m i^n) [n \text{ needs to be even; } n \rightarrow 2n] \\
&= 2a_{m,2n,K} w^m \rho^{|2n|+2K} e^{i2n\phi} \left( 1 - (-1)^{(m+n)} \right) \\
&\quad [m+n \text{ needs to be odd; } m \rightarrow \text{mod}(n, 2) + 2I + 1] \\
&= a_{I,2n,K} w^{\text{mod}(n,2)+2I+1} \rho^{|2n|+2K} e^{i2n\phi}. \tag{S2}
\end{aligned}$$

Acting the  $E_{+1}$ -irrep projection operator generates an eigenfunction with eigenvalue  $i$ :

$$\begin{aligned}
f^{(i)}(w, \rho, \phi) &= f(w, \rho, \phi) - i\hat{C}_4 f(w, \rho, \phi) - \hat{C}_4^2 f(w, \rho, \phi) + i\hat{C}_4^3 f(w, \rho, \phi) \\
&= a_{m,n,K} w^m \rho^{|n|+2K} e^{in\phi} (1 - i(-1)^m (-i)^n - (-1)^n + i(-1)^m i^n) \\
&= a_{m,n,K} w^m \rho^{|n|+2K} e^{in\phi} (1 - (-1)^n) (1 + (-1)^m i^{n+1}) \quad [n \text{ needs to be odd; } n \rightarrow 2n - 1] \\
&= 2a_{m,2n-1,K} w^m \rho^{|2n-1|+2K} e^{i(2n-1)\phi} (1 + (-1)^{m+n}) \\
&\quad [m + n \text{ needs to be even; } m \rightarrow \text{mod}(n, 2) + 2I] \\
&= a_{I,2n-1,K} w^{\text{mod}(n,2)+2I} \rho^{|2n-1|+2K} e^{i(2n-1)\phi}. \tag{S3}
\end{aligned}$$

## Section S2 Obtaining the $(e + b_2)$ expansions with

$$\left(\chi^{C_4}, (\chi_{Re}^{\sigma_v}, \chi_{Im}^{\sigma_v})\right) = (-1, (1, -1))$$

Now the  $w$  in the  $(e + b)$  expansion in Table 3 in the main text is for a  $b_2$  mode, and the real and imaginary parts are

$$\begin{aligned} Re &= w^{\text{mod}(m,2)+2I+1} [b_{2I,2K}^{r,2m} \cos 2m\phi - b_{2I,2K}^{i,2m} \sin 2m\phi]; \\ Im &= w^{\text{mod}(m,2)+2I+1} [b_{2I,2K}^{r,2m} \sin 2m\phi + b_{2I,2K}^{i,2m} \cos 2m\phi]. \end{aligned} \quad (\text{S4})$$

The  $\rho^{|2m|+2K}$  factor is ignored as it does not transform under  $\hat{\sigma}_v$ . Acting  $\hat{P}_{\sigma_v,e}$  and  $\hat{P}_{\sigma_v,d}$  on  $Re$  and  $Im$  respectively,

$$\begin{aligned} \hat{P}_{\sigma_v,e} Re &= w^{\text{mod}(m,2)+2I+1} \left[ b_{2I,2K}^{r,2m} \cos 2m\phi \left(1 - (-1)^{\text{mod}(m,2)}\right) - b_{2I,2K}^{i,2m} \sin 2m\phi \left(1 + (-1)^{\text{mod}(m,2)}\right) \right]; \\ \hat{P}_{\sigma_v,o} Im &= w^{\text{mod}(m,2)+2I+1} \left[ b_{2I,2K}^{r,2m} \sin 2m\phi \left(1 - (-1)^{\text{mod}(m,2)}\right) + b_{2I,2K}^{i,2m} \cos 2m\phi \left(1 + (-1)^{\text{mod}(m,2)}\right) \right]. \end{aligned} \quad (\text{S5})$$

Obviously, when  $m$  is even only the  $b^i$  terms survive and when  $m$  is odd only the  $b^r$  terms survive. Therefore, keeping only the  $b^r$  terms with odd  $m$  and the  $b^i$  terms with even  $m$  in the  $(e + b)$  formula in Eq. 3 gives the  $(e + b_2)$  formula with  $(\chi^{C_4}, (\chi_{Re}^{\sigma_v}, \chi_{Im}^{\sigma_v})) = (-1, (1, -1))$ :

$$\begin{aligned} b_{2I,2K}^{r,4k} w^{2I+1} \rho^{|4k|+2K} (\cos 4k\phi + i \sin 4k\phi) + i b_{2I,2K}^{i,4k+2} w^{2I} \rho^{|4k+2|+2K} (\cos (4k+2)\phi + i \sin (4k+2)\phi) \\ = b_{2I,2K}^{r,4k} w^{2I+1} \rho^{|4k|+2K} e^{i4k\phi} + i b_{2I,2K}^{i,4k+2} w^{2I} \rho^{|4k+2|+2K} e^{i(4k+2)\phi}. \end{aligned} \quad (\text{S6})$$

Here,  $m$  has been replaced by  $2k$  and  $2k+1$  to differentiate its being odd and even. Dropping the imaginary part gives the  $(e + b_2)$  formula with  $(\chi^{C_4}, (\chi_{Re}^{\sigma_v}, \chi_{Im}^{\sigma_v})) = (-1, (1, 0))$ :

$$b_{2I,2K}^{r,4k} w^{2I+1} \rho^{|4k|+2K} \cos 4k\phi - b_{2I,2K}^{i,4k+2} w^{2I} \rho^{|4k+2|+2K} \sin (4k+2)\phi. \quad (\text{S7})$$

## Section S3 Constraints on root expansions to obtain $I$ -adapted expansions in $C_{4h}$ symmetry

Table S1: Constraints on expansions in Table 2 in the main text to give the appropriate ( $\chi^{C_4} = 1, \chi^I$ ).

| Vibrational Modes          | (1, 1)              | (1, -1)             |
|----------------------------|---------------------|---------------------|
| $(a_g + a_g)$              | nr                  | na                  |
| $(a_g + a_u)^\dagger$      | $I_2$ even          | $I_2$ odd           |
| $(a_u + a_u)$              | $I_1, I_2$ ee or oo | $I_1, I_2$ eo or oe |
| $(a_g + b_g), (a_g + b_u)$ | nr                  | na                  |
| $(a_u + b_g), (a_u + b_u)$ | $I_1, I_2$ even     | $I_1, I_2$ odd      |
| $(b_g + b_g), (b_u + b_u)$ | nr                  | na                  |
| $(b_g + b_u)$              | $a_{ee}$ nZ         | $a_{oo}$ nZ         |
| $(e_g + a_g), (e_u + a_g)$ | nr                  | na                  |
| $(e_g + a_u), (e_u + a_u)$ | $I$ even            | $I$ odd             |
| $(e_g + b_g), (e_u + b_g)$ | nr                  | na                  |
| $(e_g + b_u), (e_u + b_u)$ | $m$ even            | $m$ odd             |
| $(e_g + e_g), (e_u + e_u)$ | nr                  | na                  |
| $(e_g + e_u)$              | $m_1$ even          | $m_1$ odd           |

<sup>†</sup> For two modes whose irreps only differ in subscripts,  $\alpha$ -subscripted coordinates in Table 2 in the main text are for the first ( $a_g$  here) and  $\beta$ - for the second ( $a_u$  here) mode. This rule applies in all constraints tables in ESI and the main text.

Table S2: Constraints on expansions in Table 3 in the main text to give the appropriate ( $\chi^{C_4} = -1, \chi^I$ ).

| Vibrational Modes          | $(-1, 1)$   | $(-1, -1)$  |
|----------------------------|-------------|-------------|
| $(a_g + b_g)$              | nr          | na          |
| $(a_g + b_u)$              | na          | nr          |
| $(a_u + b_g)$              | $I_1$ even  | $I_1$ odd   |
| $(a_u + b_u)$              | $I_1$ odd   | $I_1$ even  |
| $(b_g + b_g)$              | nr          | na          |
| $(b_g + b_u)$              | $b_{oe}$ nz | $b_{eo}$ nz |
| $(b_u + b_u)$              | na          | nr          |
| $(e_u + a_g), (e_g + a_g)$ | nr          | na          |
| $(e_u + a_u), (e_g + a_u)$ | $I$ even    | $I$ odd     |
| $(e_u + b_g), (e_g + b_g)$ | nr          | na          |
| $(e_u + b_u), (e_g + b_u)$ | $m$ odd     | $m$ even    |
| $(e_u + e_u)$              | nr          | na          |
| $(e_u + e_g)$              | $m_1$ even  | $m_1$ odd   |
| $(e_g + e_g)$              | nr          | na          |

Table S3: Constraints on expansions in Table 4 in the main text to give the appropriate ( $\chi^{C_4} = i, \chi^I$ ).

| Vibrational Modes | $(i, 1)$  | $(i, -1)$  |
|-------------------|-----------|------------|
| $(e_g + a_g)$     | nr        | na         |
| $(e_g + a_u)$     | $I$ even  | $I$ odd    |
| $(e_u + a_g)$     | na        | nr         |
| $(e_u + a_u)$     | $I$ odd   | $I$ even   |
| $(e_g + b_g)$     | nr        | na         |
| $(e_g + b_u)$     | $n$ even  | $n$ odd    |
| $(e_u + b_g)$     | na        | nr         |
| $(e_u + b_u)$     | $n$ odd   | $n$ even   |
| $(e_g + e_g)$     | nr        | na         |
| $(e_g + e_u)$     | $m_1$ odd | $m_1$ even |
| $(e_u + e_u)$     | na        | nr         |
